# Supplementary material for: Arabidopsis AtHB7 and AtHB12 evolved divergently to fine tune processes associated with growth and responses to water stress
Source: PubMed Central journal article supplement (PMC4064807; doi:10.1186/1471-2229-14-150), 2014-05-31

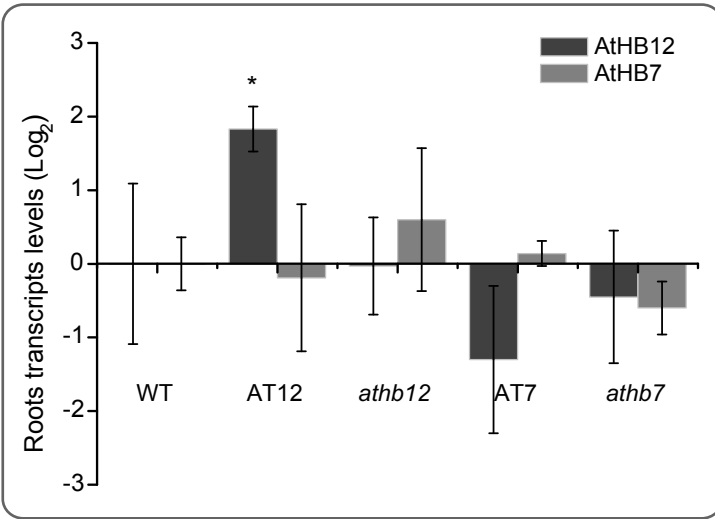

Supplement: 1471-2229-14-150-S3.pdf [file 1471-2229-14-150-S3.pdf]
