# Supplementary material for: Arabidopsis AtHB7 and AtHB12 evolved divergently to fine tune processes associated with growth and responses to water stress
Source: BMC Plant Biol. 2014 May 31;14:150. doi: 10.1186/1471-2229-14-150 (PMC4064807; doi:10.1186/1471-2229-14-150)
Supplement: Additional file 2 — Protein sequence alignment of AtHB7 and AtHB12. The positions of the HD, the LZ and the putative sumoylation, phosphorylation, transactivation and unknown motifs are indicated. [file 1471-2229-14-150-S2.pdf]

|        |                                                              |                                  |
|--------|--------------------------------------------------------------|----------------------------------|
| ATHB12 | MEEGDFFNCCFSEISSGMTM--NKKKMKKS                               | NNQKRFSEEQIKSLELIFESETRLEPRKKV   |
| ATHB7  | MTEGGEYSPAMMSAEPFLTMKKMKKSNHNK                               | NNQRRFSDEQIKSLEMMFESETRLEPRKKV   |
|        | * **                                                         | *** ** *                         |
|        |                                                              | ↓ ↓ ↓ ↓ ↓ ↓ ↓ ↓                  |
| ATHB12 | QVARELGLQPRQVAIWQNKRRARWKTQ                                  | LEKEYNTLRANYNNLASQFEIMKKEKQSLVSE |
| ATHB7  | QLARELGLQPRQVAIWQNKRRARWKSQ                                  | LETEYNILRQNYDNLASQFESLKKEKQALVSE |
|        | * *                                                          | ***** *                          |
|        | ↓                                                            |                                  |
| ATHB12 | LQRLNEEMQRPKEEKHHECCGDQGLALSSSTESHNGKS                       | -----EPE-----GRLDQ               |
| ATHB7  | LQRLKEATQKKTQEEERQCSGDQAVVALSSTHHESENEENRRRKPEEVRPEMEMKDDKGH |                                  |
|        | **** *                                                       | *** **                           |
| ATHB12 | GSVLCN-----DGDYNNNIKTEYFGFEEETDHELMNIVEKADDSCLTSSSENWGGFN    | SD                               |
| ATHB7  | HGVMCDHHDYEDDDNGYSNNIKREYFGGFEEEPDHLMNIVEP-ADSCLTSSDDWRGFKSD |                                  |
|        | * *                                                          | * * * * * * * * * * * *          |
| ATHB12 | S--LLDQSSSNYPNWWFWS                                          |                                  |
| ATHB7  | TTTLLDQSSSNYP-WRDFWS                                         |                                  |
|        | ***** * * *                                                  |                                  |

   : Homeodomain  
 ↓ : Leucine zipper  
 : Putative phosphorylation sites  
 : Putative AHA motif  
 : Conserved motif
